# Supplementary material for: Bioinspired ultra-stretchable and anti-freezing conductive hydrogel fibers with ordered and reversible polymer chain alignment
Source: PubMed Central journal article supplement (PMC6123392; doi:10.1038/s41467-018-05904-z), 2018-09-04
Supplement: 41467_2018_5904_MOESM2_ESM.pdf [file 41467_2018_5904_MOESM2_ESM.pdf]

## **Description of Additional Supplementary Files**

File Name: Supplementary Movie 1

Description: The preparation of a PAH fiber from the optimal PAAS solution.

File Name: Supplementary Movie 2

Description: The water sensitivity of a PAH fiber and the water resistance of a MAPAH fiber at stretched status (~ 200% elongation).

File Name: Supplementary Movie 3

Description: The hysteresis effect during a MAPAH fiber's recovery after a large elongation.

File Name: Supplementary Movie 4

Description: A MAPAH fiber serves as a highly stretchable wire in an electric circuit.
